# Supplementary material for: Anti-Oxidized LDL Antibodies and Coronary Artery Disease: A Systematic Review
Source: PubMed Central journal article supplement (PMC6826549; doi:10.3390/antiox8100484), 2019-10-15
Supplement: antioxidants-08-00484-s001.pdf [file antioxidants-08-00484-s001.pdf]

## Supplemental File 1: Search strategy

| Database       | # of refs | # of refs after de-duplication |
|----------------|-----------|--------------------------------|
| Medline Ovid   | 867       | 193                            |
| embase.com     | 1365      | 1343                           |
| Web of science | 1133      | 405                            |
| Google scholar | 200       | 118                            |
| Total          | 3565      | 2059                           |

12-06-2018

### Medline Ovid

((oxidized low density lipoprotein.mp. AND (Antibodies/ OR Autoantibodies/ OR exp immunoglobulins/ OR exp Mast Cells/)) OR (((oxid\* OR ox) ADJ6 (low-density-lipoprotein\* OR ldl OR specific-epitope\*) ADJ6 (antibod\* OR anti OR autoantibod\* OR Immune-respon\* OR immunoglobulin\* OR Igg\* OR ige\* OR igm\* OR iga\* OR mast-cell\*)) OR ((oxLDL\* OR ose) ADJ3 (antibod\* OR anti OR autoantibod\* OR Immune-respon\* OR immunoglobulin\* OR Igg\* OR ige\* OR igm\* OR iga\* OR mast-cell\*))).ab,ti.) AND (exp arteriosclerosis/ OR (atherosclero\* OR arteriosclero\* OR athero-sclero\* OR arterio-sclero\* OR atherogenes\* OR plaque\* OR ((peripheral\* OR coronar\*) ADJ3 artery ADJ3 disease\*) OR pad OR poad).ab,ti.) NOT (exp animals/ NOT humans/) AND english.la.

### embase.com

('oxidized low density lipoprotein antibody'/exp OR (('oxidized low density lipoprotein'/de OR ('low density lipoprotein'/de AND (oxidation/de OR 'lipid oxidation'/de OR 'lipid peroxidation'/de))) AND ('immune response'/de OR antibody/de OR autoantibody/de OR 'antibody titer'/de OR 'antibody detection'/de OR 'immunoglobulin'/exp OR 'immunoglobulin antibody'/exp OR 'mast cell'/de)) OR (((oxid\* OR ox) NEAR/6 (low-density-lipoprotein\* OR ldl OR specific-epitope\*) NEAR/6 (antibod\* OR anti OR autoantibod\* OR Immune-respon\* OR immunoglobulin\* OR Igg\* OR ige\* OR igm\* OR iga\* OR mast-cell\*)) OR ((oxLDL\* OR ose) NEAR/3 (antibod\* OR anti OR autoantibod\* OR Immune-respon\* OR immunoglobulin\* OR Igg\* OR ige\* OR igm\* OR iga\* OR mast-cell\*))) :ab,ti) AND ('atherosclerosis'/exp OR 'arteriosclerosis'/exp OR 'peripheral occlusive artery disease'/exp OR 'coronary artery disease'/exp OR (atherosclero\* OR arteriosclero\* OR athero-sclero\* OR arterio-sclero\* OR atherogenes\* OR plaque\* OR ((peripheral\* OR coronar\*) NEAR/3 artery NEAR/3 disease\*) OR pad OR poad):ab,ti) NOT ([animals]/lim NOT [humans]/lim) AND [english]/lim

### Web of science

TS=((((oxid\* OR ox) NEAR/5 (low-density-lipoprotein\* OR ldl OR specific-epitope\*) NEAR/5 (antibod\* OR anti OR autoantibod\* OR Immune-respon\* OR immunoglobulin\* OR Igg\* OR ige\* OR igm\* OR iga\* OR mast-cell\*)) OR ((oxLDL\* OR ose) NEAR/2 (antibod\* OR anti OR

autoantibod\* OR Immune-respon\* OR immunoglobulin\* OR Igg\* OR ige\* OR igm\* OR iga\* OR mast-cell\*)) AND ((atherosclero\* OR arteriosclero\* OR athero-sclero\* OR arterio-sclero\* OR atherogenes\* OR plaque\* OR ((peripheral\* OR coronar\*) NEAR/2 artery NEAR/2 disease\*) OR pad OR poad))) AND LA=(english)

### **Google scholar**

"oxidized low-density-lipoprotein"|"ox ldl"|oxldl anti|antibodies|antibody atherosclerosis|arteriosclerosis|atherogenesis|plaque|"peripheral|coronary artery diseases|disease"

**Supplemental Table 1. Quality control**

|                                | First author    | Year | Selection                                       |                                            |                                  |                                                                                 | Comparability*                                                                    | Outcome/Exposure                 |                                                            |                                         | Total                                               |
|--------------------------------|-----------------|------|-------------------------------------------------|--------------------------------------------|----------------------------------|---------------------------------------------------------------------------------|-----------------------------------------------------------------------------------|----------------------------------|------------------------------------------------------------|-----------------------------------------|-----------------------------------------------------|
| <b>cohort studies</b>          |                 |      | <i>Representativeness of the exposed cohort</i> | <i>Selection of the non-exposed cohort</i> | <i>Ascertainment of exposure</i> | <i>Demonstration that outcome of interest was not present at start of study</i> | <i>Comparability of cohorts on the basis of the design or analysis</i>            | <i>Assessment of outcome</i>     | <i>Was follow-up long enough for outcomes to occur</i>     | <i>adequacy of follow-up of cohorts</i> | number of stars awarded/<br>maximum number of stars |
|                                | Björkbacka      | 2016 | *                                               | NA                                         | *                                |                                                                                 | **                                                                                | *                                | *                                                          | *                                       | 7/8                                                 |
|                                | Maiolino†       | 2013 | *                                               | NA                                         | *                                | *                                                                               | **                                                                                | *                                | *                                                          |                                         | 7/8                                                 |
|                                | Meeuwse         | 2017 | *                                               | NA                                         | *                                |                                                                                 | **                                                                                | *                                | *                                                          | *                                       | 7/8                                                 |
|                                | Prasad          | 2017 | *                                               | NA                                         | *                                |                                                                                 | **                                                                                |                                  | *                                                          | *                                       | 6/8                                                 |
|                                | Tsimikas†       | 2007 | *                                               | NA                                         | *                                | *                                                                               |                                                                                   |                                  | *                                                          |                                         | 4/8                                                 |
|                                | Tsimikas        | 2012 | *                                               | NA                                         | *                                |                                                                                 | **                                                                                | *                                | *                                                          | *                                       | 7/8                                                 |
|                                | Wilson          | 2006 | *                                               | NA                                         | *                                | *                                                                               | **                                                                                | *                                | *                                                          | *                                       | 8/8                                                 |
| <b>Case-control studies</b>    |                 |      | <i>Case definition</i>                          | <i>Representativeness of the cases</i>     | <i>Selection of controls</i>     | <i>definition of controls</i>                                                   | <i>Comparability of cases and controls on the basis of the design or analysis</i> | <i>Ascertainment of exposure</i> | <i>same method of ascertainment for cases and controls</i> | <i>non-response rate</i>                | number of stars awarded/<br>maximum number of stars |
|                                | Khamis          | 2016 |                                                 | *                                          | *                                | *                                                                               | **                                                                                | *                                | NA                                                         | NA                                      | 6/7                                                 |
|                                | Ravendi         | 2011 |                                                 | *                                          | *                                | *                                                                               | **                                                                                | *                                | NA                                                         | NA                                      | 6/7                                                 |
|                                | Van den Berg    | 2018 |                                                 | *                                          | *                                | *                                                                               | **                                                                                | *                                | NA                                                         | NA                                      | 6/7                                                 |
| <b>Cross-sectional studies</b> |                 |      | <i>Representativeness of the sample</i>         | <i>Sample size</i>                         | <i>Non-respondents</i>           | <i>Ascertainment of the exposure (risk factor)</i>                              | <i>Comparability of subjects in different outcome groups</i>                      | <i>Assessment of the outcome</i> | <i>Statistical test</i>                                    |                                         | number of stars awarded/<br>maximum number of stars |
|                                | Bilgen          | 2005 | *                                               |                                            | NA                               | **                                                                              |                                                                                   |                                  |                                                            |                                         | 3/9                                                 |
|                                | Che             | 2011 | *                                               |                                            | NA                               | **                                                                              |                                                                                   |                                  | *                                                          |                                         | 4/9                                                 |
|                                | Chen            | 2011 | *                                               |                                            | NA                               | **                                                                              | *                                                                                 |                                  |                                                            |                                         | 4/9                                                 |
|                                | Garrido-Sanchez | 2009 | *                                               |                                            | NA                               |                                                                                 |                                                                                   |                                  |                                                            |                                         | 1/9                                                 |
|                                | Gruzdeva        | 2014 | *                                               |                                            | NA                               | **                                                                              |                                                                                   |                                  |                                                            |                                         | 3/9                                                 |
|                                | Maiolino†       | 2012 | *                                               |                                            | NA                               | **                                                                              |                                                                                   |                                  |                                                            |                                         | 3/9                                                 |
|                                | Moohebbati      | 2014 | *                                               |                                            | NA                               | **                                                                              |                                                                                   |                                  |                                                            |                                         | 3/9                                                 |
|                                | Rossi           | 2003 | *                                               | *                                          | NA                               | **                                                                              | *                                                                                 | **                               |                                                            |                                         | 7/9                                                 |
|                                | Soto            | 2009 | *                                               |                                            | NA                               | **                                                                              |                                                                                   | *                                |                                                            |                                         | 4/9                                                 |
|                                | Tsimikas†       | 2007 | *                                               |                                            | NA                               | **                                                                              | *                                                                                 |                                  | *                                                          |                                         | 5/9                                                 |

---

*\* Comparability can be rated with two stars*

*† Article applied both cohort design and cross-sectional design*
